# Supplementary material for: Garlic Consumption and All-Cause Mortality among Chinese Oldest-Old Individuals: A Population-Based Cohort Study
Source: MDPI journal article supplement (doi:10.3390/nu11071504), 2019-06-30
Supplement: s1 [file s1]

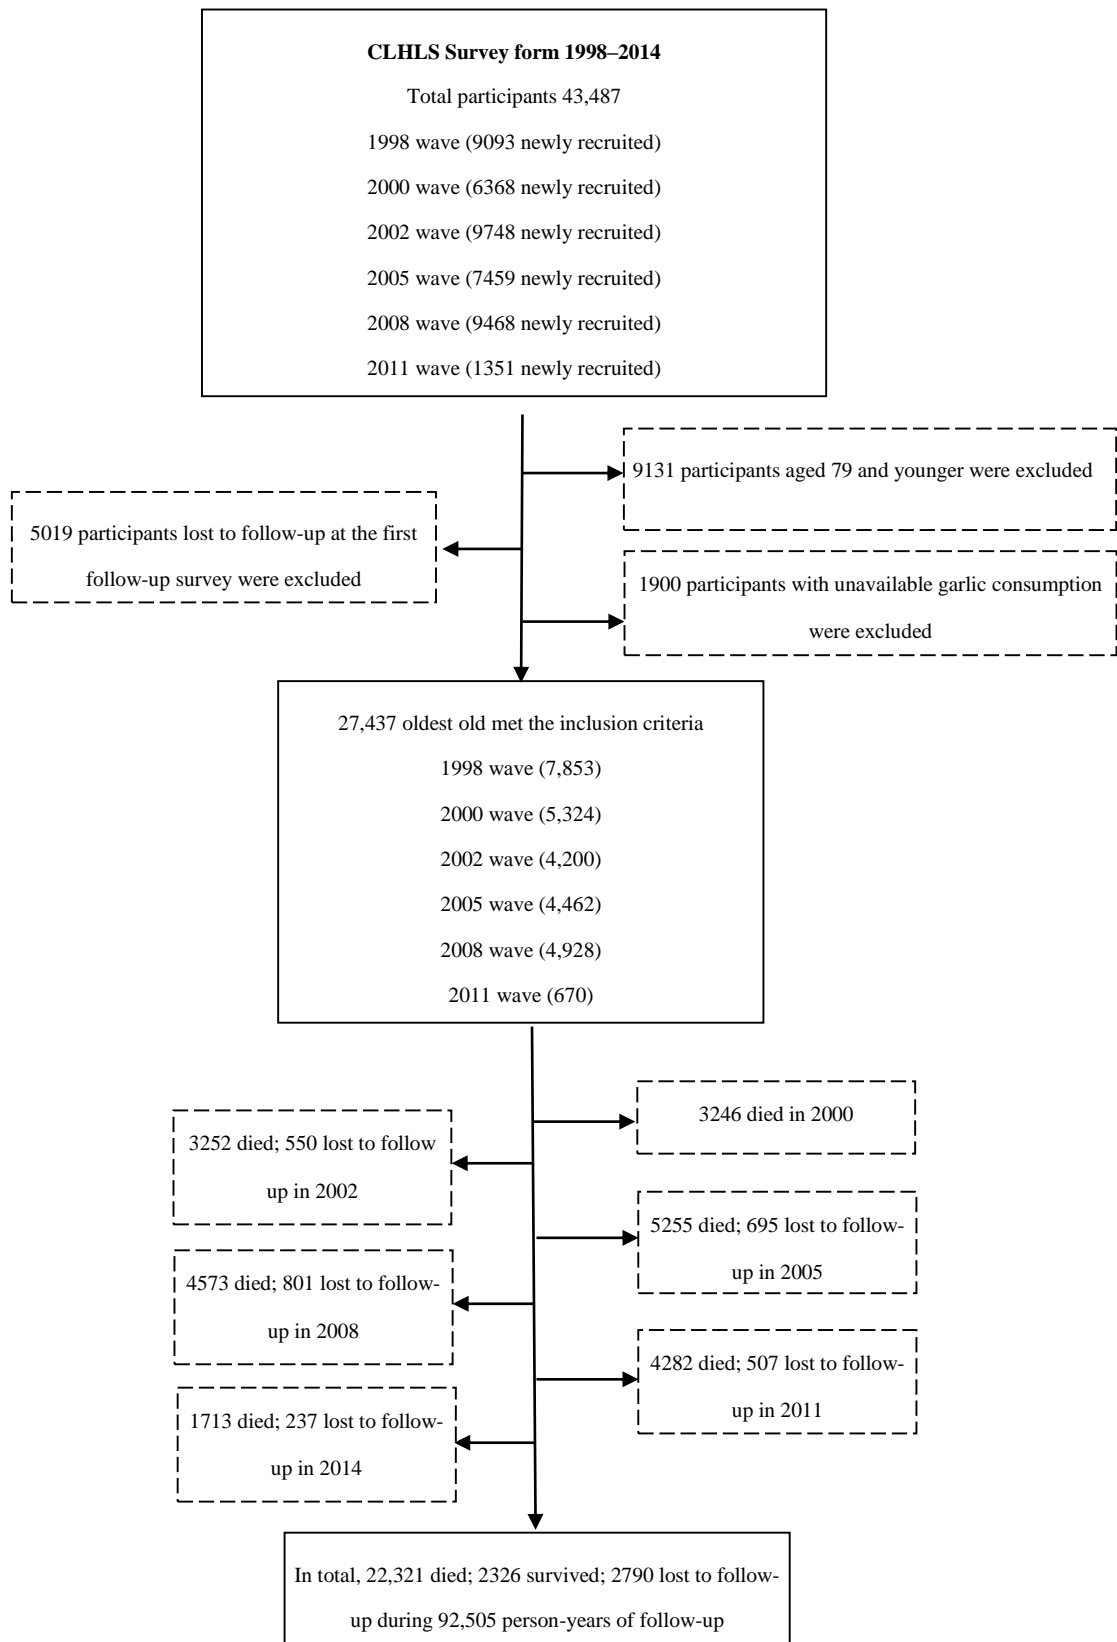

**Figure S1.** Cohort Selection Criteria, CLHLS Survey from 1998 to 2014. CLHLS: Chinese Longitudinal Healthy Longevity Study.
